# Supplementary material
Source: PubMed Central journal article supplement (PMC3173172)
Supplement: supp_M111.245696_jbc.M111.245696-2.pdf [file supp_M111.245696_jbc.M111.245696-2.pdf]

## **SUPPLEMENTAL INFORMATION**

### **Membrane Localization of Small Proteins in *Escherichia coli*\***

Fanette Fontaine<sup>1</sup>, Ryan T. Fuchs<sup>1,2</sup>, and Gisela Storz<sup>3</sup>

*\*From the Cell Biology and Metabolism Program, Eunice Kennedy Shriver National Institute of Child Health and Human Development, Bethesda, MD, USA*

TABLE S1. **Plasmids used in study.**

TABLE S2. **Strains used in study.**

TABLE S3. **Oligonucleotides used in study.**

TABLE S4. **Data for subcellular fractionation using a sucrose cushion.**

TABLE S5. **Data for subcellular fractionation using sarcosyl.**

TABLE S6. **Data for effect of depletions.**

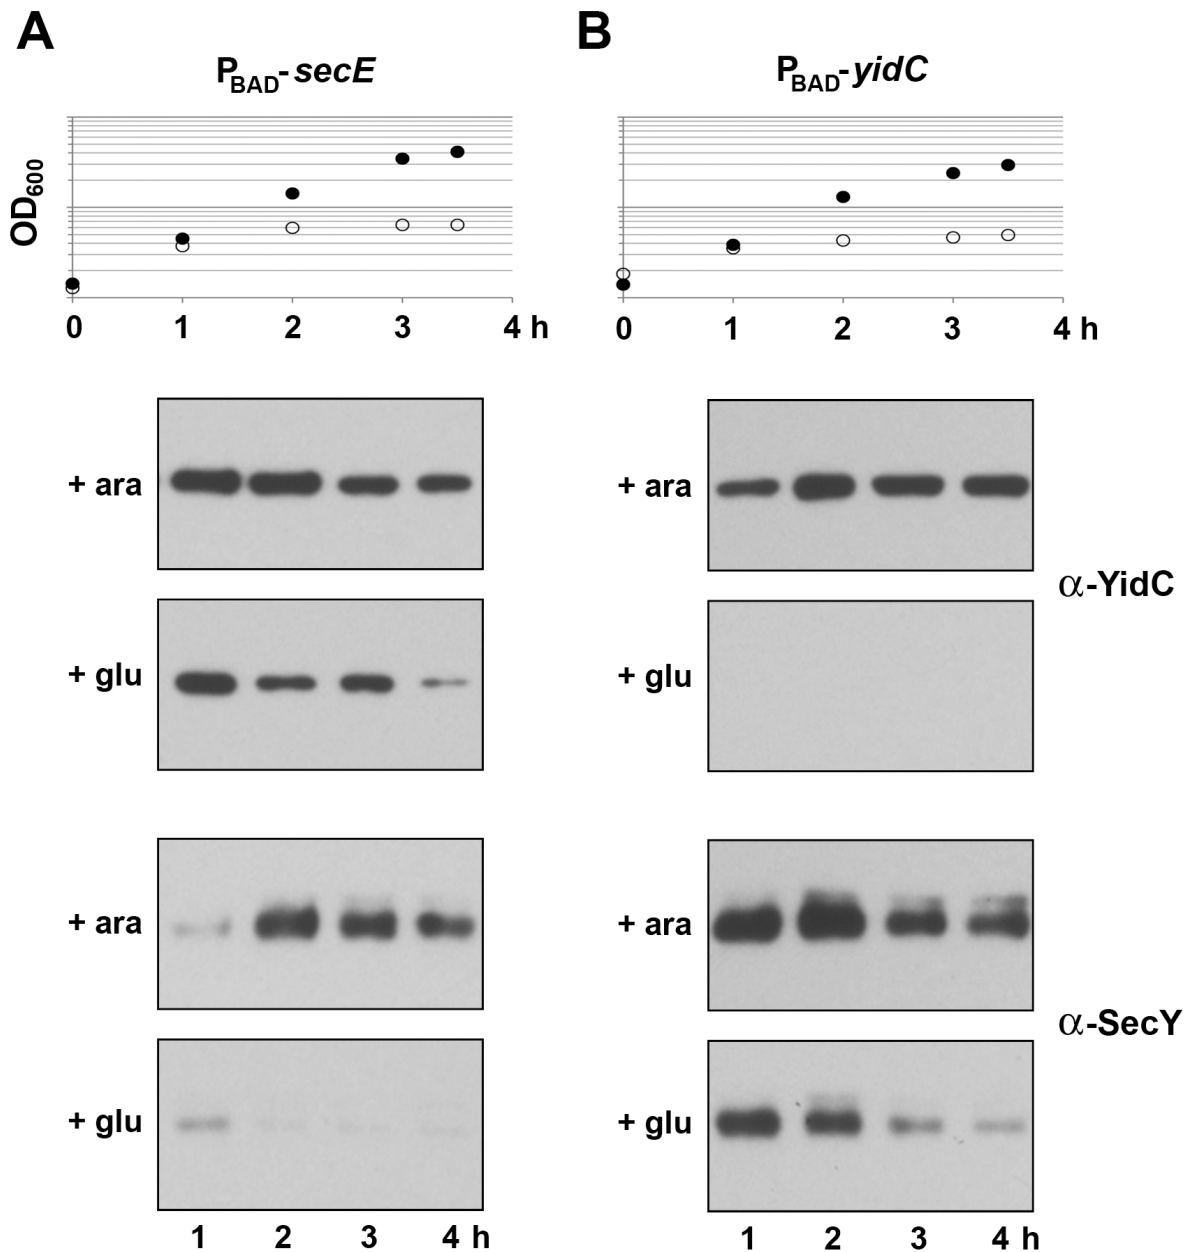

**FIGURE S1. Growth delay upon SecE and YidC depletion.** Growth curve of cells containing  $P_{BAD}\text{-}secE$  (A) or  $P_{BAD}\text{-}yidC$  (B) chromosomal fusions. Log phase cells growing in LB medium containing 0.2% arabinose were collected and washed. The cells were then resuspended and split into fresh LB containing 0.2% arabinose (filled circles) or 0.2% glucose (open circles). Growth was monitored by measuring the OD<sub>600nm</sub> over time. At each time point, 1ml of cells were harvested and subject to immunoblot analysis using antibodies against YidC or SecY. After 3 h of SecE depletion, more than 95% of SecY is depleted, while YidC levels are only reduced by 15%. Similarly, after 3 h of YidC depletion, 99% of YidC is depleted, while SecY levels were reduced by 60%.

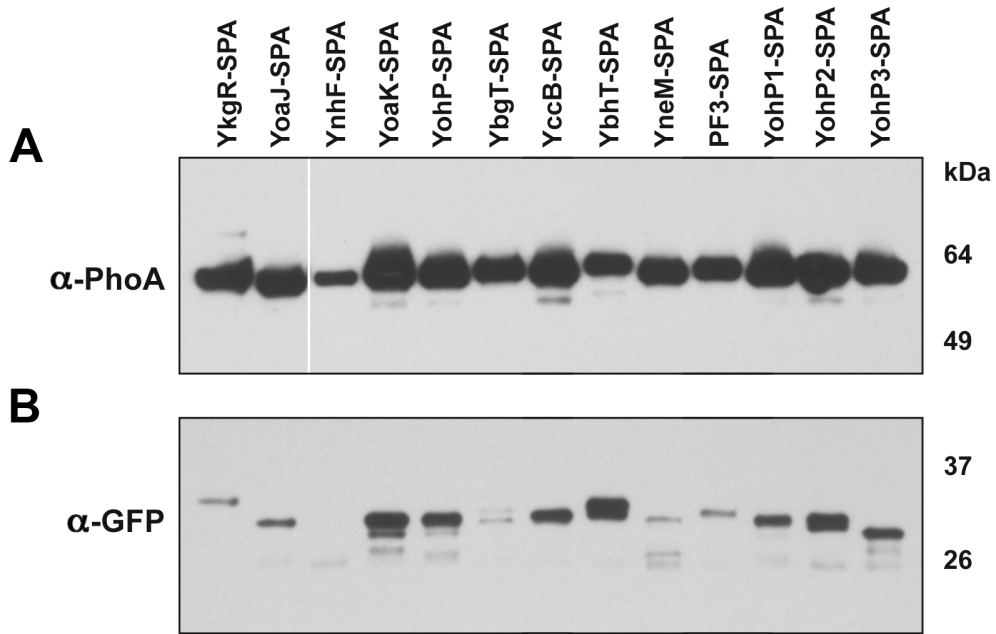

FIGURE S2. Levels GFP and PhoA fusion proteins. Immunoblot using antibodies against PhoA (A) or GFP (B).

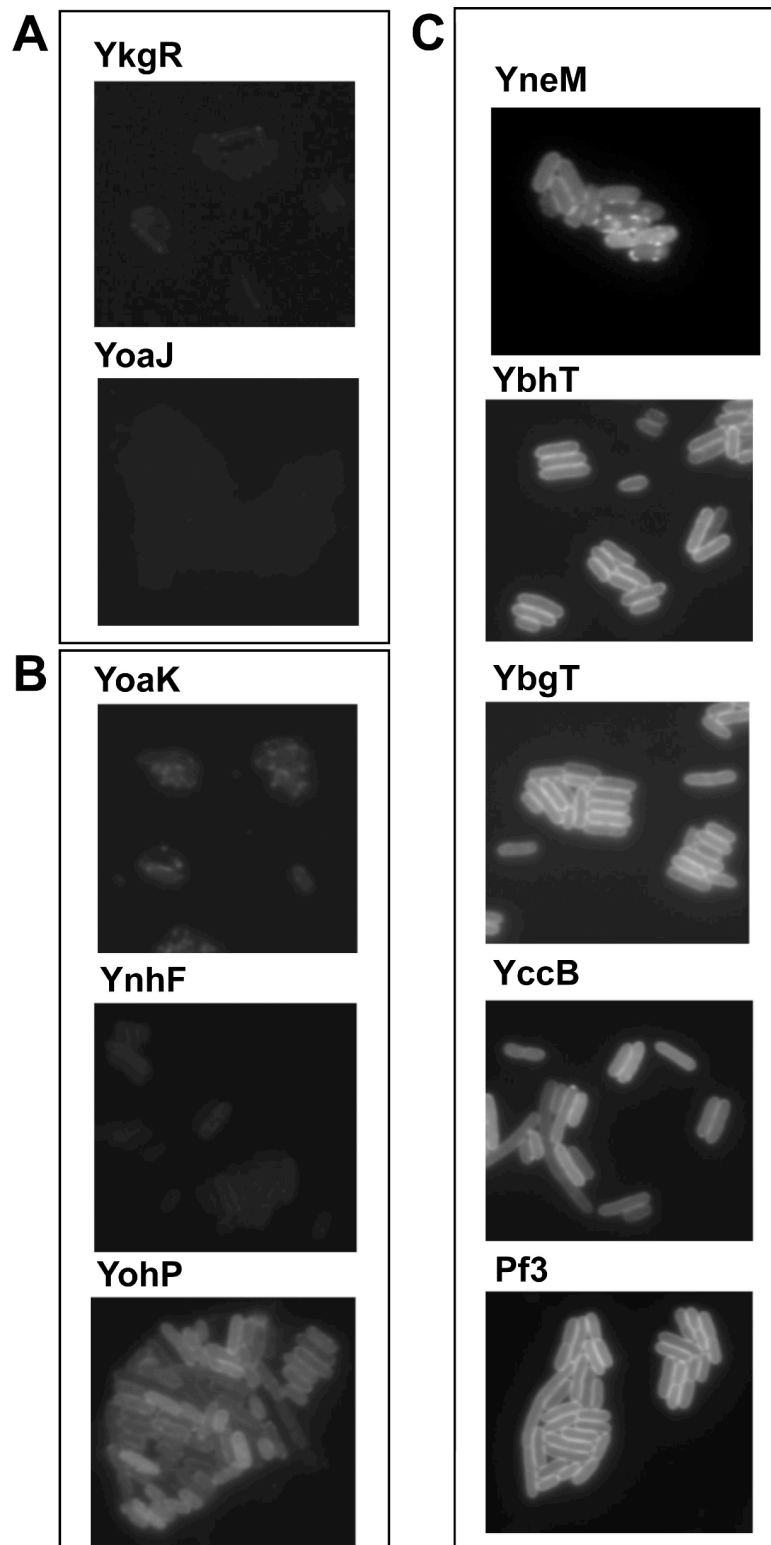

FIGURE S3. **Microscopy of small protein-GFP fusions.** Images were taken for small proteins with an orientation  $C_{out}-N_{in}$  (A),  $C_{in/out}-N_{in/out}$  (B) and  $C_{in}-N_{out}$  (C). Overnight cultures were diluted 1:50 in LB containing 25  $\mu\text{g/ml}$  chloramphenicol and 50  $\mu\text{g/ml}$  kanamycin and incubated at 37°C for 90 min. To induce T7 RNA polymerase, cells were grown for another 4 h in the presence of 0.4 mM IPTG. Cells were spread on a thin layer of agarose between a slide and cover slip and examined under the microscope. The images were taken at the 100x magnification.

# A

## YkgR

```
ECOLI MKENKVQQISHKLINIVVFVAIVEYAYLFLHFY
ESPE4 MKENKVQQISHKLINIVVFFVIVEYAYLFLHFY
SHIBO MKENKVQQISHKLINIVVFVAIVEYAYLFLHFY
EFERG MKENKIQQISHKLINIVVFVAIVEYAYLFLHFY
EALBE MKENKIQKISNKLINIVVFVAVVEYAYLFLHFY
*****:*.**:*****.:*****
```

## YoaJ

```
ECOLI MKKTTIIMMGVAIVVVLGTELGW
KLEPN MKKSTIIMLVVAIVAVAGTQFGW
ENT38 VRKTTIIMLIIAVVAVAGSQLGW
SALTY MRKTTMVLMGIALIAVAGTELGW
*:*:*:*:*:*:*:*:*:*:*:*:*:*:*
```

# B

## YnhF

```
ECOLI MSTDLKFSLVTTIIVLGLIVAVGLTAALH-
SALTY MSTDLKFSLITTLIVLGVIVAGGLTAALH-
ENT38 MNTDLKFSLTTTIIIVLGLIVAASF TAILH-
KLEPN MDTNLKFSLITTTIIALGVIVAFSLTAILH-
SERPR MDTDLKMSLFTTVCALAVIIAFSFTAALN-
PHOPR MEADLKFBALITTTGVVFAILIGFGLTAIGA-
VIBHB MEHDLKSALLIVVTIFAVLLSFGIIAITTA
* . : ** : * . : : : : . : *
```

## YoaK

```
ECOLI MRIGIIFPVVIFITAVVFLAWFFIGGYAAPGA-
SERPR MKIGYLFVPSIIITAVVLLAWFIIIGGYAMPA--
ENT38 MRIGIVFPVVIFITAVVFLTWFFVGGYAAPGA-
SALTY MRVGILFPVVIFITAILFLAWFFIGGYAAPGA-
CITKO MKLGIIFPVVIFITAVTFLAWFFIGGYATPGA-
KLEPN MKLGIILFPVAIFIIAVVFLGWFFVGGYAAPGGA
LACPL MRLGIPLTAVVVFVALVEMFWFHLVGLA-----
*:* * :.. :*: : : : * * : * *
```

## YohP

```
YEREN -MKIILWIIAIIFIVGLLTITGVFKLIF
SODGL -MKIFLWIIAIIFIVGLLTITGVFKLIF
SALTY -MKILLWAILIIFLIGLLVVTGVFKMIF
ENT38 -MKILLWVLIIFLIGLLVVTGVFKMIF
ECOLI -MKIILWAVLIIFLIGLLVVTGVFKMIF
PSE14 MLKFLGSTVGIIFLIGLVVIALFKLVF
RHOS1 MLKFIGGTVGIIFLVGLLVIIGILALIF
*:*: : : **:*:*:*:*:*:*:*:*
```

# C

## YbgT

ECOLI MWYFAWILGTTLLACSGFVITALALEHVESGKAGQEDI  
 CITSP MWYFAWILGTTLLACAFGIITALALEHVESGKAGQED-  
 KLESP MWYFAWILGTTLLACAFGVITALALEHVEATKAGKEE-  
 KLEPN MWYFAWILGTTLLACAFGVITALALEHVEATKAGKKE-  
 ENTSP MWYFAWILGTTLLACAFGVITALALEHVEASKAGEEN-  
 SENTE MWYFAWILGTTLLACAFGIITALALEHVEAGKTGQEE-  
 SERPR MWYFAWILGTTLLACAFGIITALALEHHEDSKAQDD-  
 ERWCA MWYFAWILGTTLLACSLGIITALAIEQSEASKAAEED-  
 PHOLU MWYFAWILGTTLLACSFIIAALALEHNEEEKVAKNS-  
 \*\*\*\*\*:.:\*:\*:\*:\*:\*: \* \* . :..

## Yccb

ECOLI MWYLLWFGILLMCSLSTLVLVWLDPRLKS  
 SHDYS MWYLLWFIGILLMCSLSTLVLVWLDPRLKS  
 EDWTA MWYLLWFGILLMCSLSTLILVWLEPRLK-  
 EALBE MWYLLWFGILLMCSLSTVVLVWLEPRLKG  
 CITSP MWYLFWFGILLMCALSTLALVWLESRQK-  
 SENTE MWYLLWFGILLMCSLSTLVLVWLESRQQ-  
 EFERG MWYQLWFGILLCAITSLVLVWLEPRFES  
 \*\*\* :\*:\*:\*\*\*\*\*:.:\*: \*\*:\*:\*. \* :

## YbhT

ECOLI MLELLKSLVFVAVIMVPVVMAILGLIYGLGEVFNIFSGVGKKDQPGQNH-  
 EFERG MLELLKSLVFVAVIMVPVVMAILGLIYGLGEVFNIFSGIGQKDQSRQNH-  
 SENTE MLELLKSLVFVAVIMVPVVMAILGLIYGLGEVFNIFSGIGQKDQSRQNR-  
 ENTSP MLELLKSLVFVAVIMVPVVMAILGAIYGLGEVFNIFSNIGHKDHPKKQH-  
 CITFR MLELLKSLVFVAVIMVPVVMAILGLIYGLGEVFNIFSGIGQKDQSRQNH-  
 KLEPN MLELLKSLVFVAVIMVPVVMIVILGLIYGLGEVFNIFSGVGHKDRSQQNH-  
 ERWPY MLELLKGLAVAVLMVPVVMAILGLIWGLGEVFNVISKLGHRDSSAN--  
 ERWTA MLELLKGLAIAILMVPVVMAILGLIWGLGEVFNVISKFGHRDDSAEN--  
 ERWCA MLELLKSLLFVAVMVPVMMVIIMGAIYCLGEVFNVLSRIGHSDGQRAKNQ  
 CROSA MFELLKSLAFVAVIMVPVVMIVILGLIWGLGEVFNIFSGIGHKDQSKQH--  
 SEROD MLELLKSLLFVAVMVPVVMAILGLIYGLAEVFNIFSKVGRSKENRTQH-  
 YERPE MFELLKSLVFVAVMVPVVMIVILGLIYGLGEVFNVISKTGHPKE-----  
 DICZA MFELLKSLVFVAVCMVPVMMALILGAIYGLGEVFNLFSAFGHRESSAAR--  
 \*:\*\*\*\*.\* .\*: \*\*:\*:\*:\*:\*: \* \*: \*.\*\*\*\*\*:\* \*: .

## YneM

ECOLI MLGNMNVFMAVLGIILFSGFLAAYFSHKWDD  
 CITKO MLGNMNVFMAVLGIILFSGFLAAYFSHKWDD  
 EALBE MLGNMNVFMAVLGIILFSGFLAAYFSHKWDD  
 CITFR MLGNMNVFMAVLGIILFSGFLAAYFSHRWDD  
 SALTY MLGSINLFIIVLGIILFSGFLAAYFSHKWDD  
 PELCA MLGNINIFIAVLGGILFLSFLAAYLSPKWDD  
 CROTU MPGAADLFICMPGIVLLAGFLAAYCSNKWDD  
 DICDA MFEQVTVYLAILAVIVVPGFLAAYLSPKWDD  
 SEROR -MGNMSVFIGFLGIISTLGLLAAYLSTKWDD  
 ::: . . : .:\*\*\*\*: \* :\*\*\*:

**FIGURE S4. Conservation of charged residues in small protein sequences.** The sequences of small proteins with an orientation (A) N<sub>in</sub>-C<sub>out</sub>, (B) dual orientation and (C) C<sub>in</sub>-N<sub>out</sub>. The sequences were identified by tBLASTn then aligned with CLUSTALW (<http://align.genome.jp/>). ‘\*’ indicates that the residues are identical in all sequences and ‘:’ and ‘.’, respectively, indicate conserved and semi-conserved substitutions as defined by ClustalW. The organism codes are defined in UniProtKB/Swiss-Prot (<http://www.uniprot.org/docs/speclist>). The positive residues (K and R) are in red and the negative (D and E) in blue. The gray box corresponds to the TM domain predicted by TMpred.



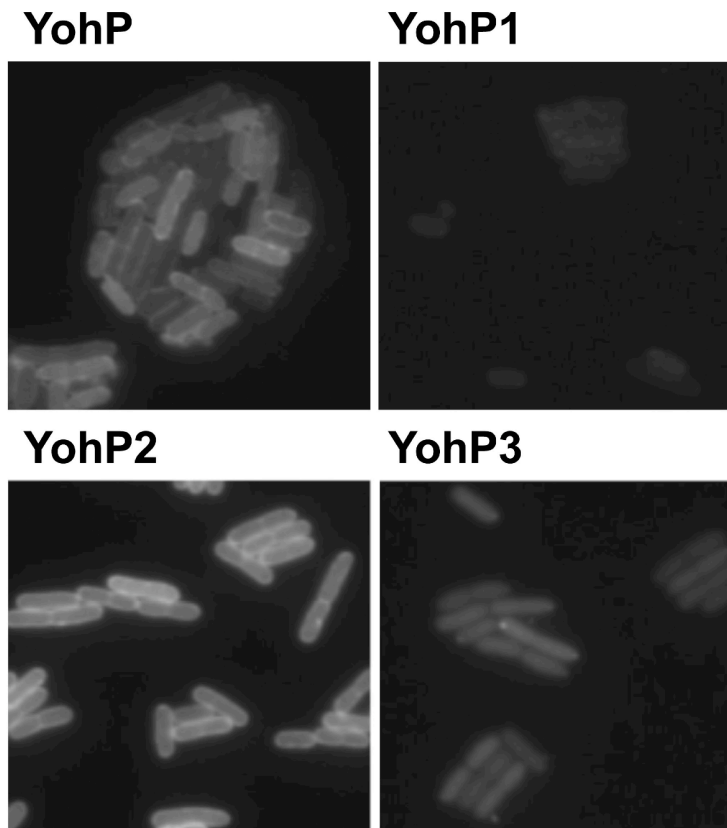

FIGURE S5. **Microscopy of mutant YohP-GFP fusions.** Cells were grown and examined as for supplemental Fig. S3.
